# Supplementary material
Source: HighWire-hosted journal article supplement (https://bmjopen.bmj.com/content/9/8/e026445)
Supplement: inline-supplementary-material-1 [file inline-supplementary-material-1.pdf]

**Supplementary Table S1:** Quality assessment of each study included in the meta-analysis, based on the Newcastle-Ottawa Scale (NOS) <sup>a</sup>

| Study ID                             | SELECTION                            |                                 |                           | COMPARABILITY                                                            |                                                                 | OUTCOME               |                                                 | Total score |                                  |
|--------------------------------------|--------------------------------------|---------------------------------|---------------------------|--------------------------------------------------------------------------|-----------------------------------------------------------------|-----------------------|-------------------------------------------------|-------------|----------------------------------|
|                                      | Representativeness of exposed cohort | Selection of non-exposed cohort | Ascertainment of exposure | Demonstration that outcome of interest was not present at start of study | Comparability of cohorts on the basis of the design or analysis | Assessment of outcome | Was follow up long enough for outcomes to occur |             | Adequacy of follow up of cohorts |
| De Jager et al. 2018 <sup>[17]</sup> | ★                                    | ★                               | ★                         | ★                                                                        | ★ ★                                                             | ★                     | ★                                               | ★           | 9                                |
| Wang et al. 2013 <sup>[11]</sup>     | ★                                    | ★                               | ★                         | ★                                                                        | ★ ★                                                             | ★                     | ★                                               | ★           | 9                                |
| Yu et al. 2015 <sup>[13]</sup>       | ★                                    | ★                               | ★                         | ★                                                                        | N/R                                                             | ★                     | ★                                               | ★           | 7                                |
| Park et al. 2015 <sup>[15]</sup>     |                                      | ★                               | ★                         | ★                                                                        | N/R                                                             | ★                     | ★                                               | ★           | 6                                |
| Dijk et al. 2015 <sup>[12]</sup>     | ★                                    | ★                               | ★                         | ★                                                                        | ★ ★                                                             | ★                     | ★                                               | ★           | 9                                |
| Schmidt et al. 2011 <sup>[14]</sup>  | ★                                    | ★                               | ★                         | ★                                                                        | N/R                                                             | ★                     | ★                                               | ★           | 7                                |
| Meyer et al. 2014 <sup>[16]</sup>    | ★                                    | ★                               | ★                         | ★                                                                        | ★ ★                                                             | ★                     | ★                                               | ★           | 9                                |
| Li et al. 2012 <sup>[10]</sup>       | ★                                    | ★                               | ★                         |                                                                          | ★ for age                                                       | ★                     | ★                                               | ★           | 7                                |

<sup>a</sup> A maximum of one star for each item within the ‘Selection’ and ‘Outcome’ categories; A maximum of two stars for ‘Comparability’ category. For ‘Comparability’, one star was awarded if the study controlled for age, another star was awarded if the study controlled for important CHD risk factors; N/R, not reported.
